# Supplementary material for: Calcium phosphate nanoparticle mediated genetic transformation in plants
Source: Royal Society of Chemistry journal article supplement (doi:10.1039/c2jm11739h), 2012-01-01
Supplement: c2jm11739h.pdf [file c2jm11739h.pdf]

## Supplementary Information

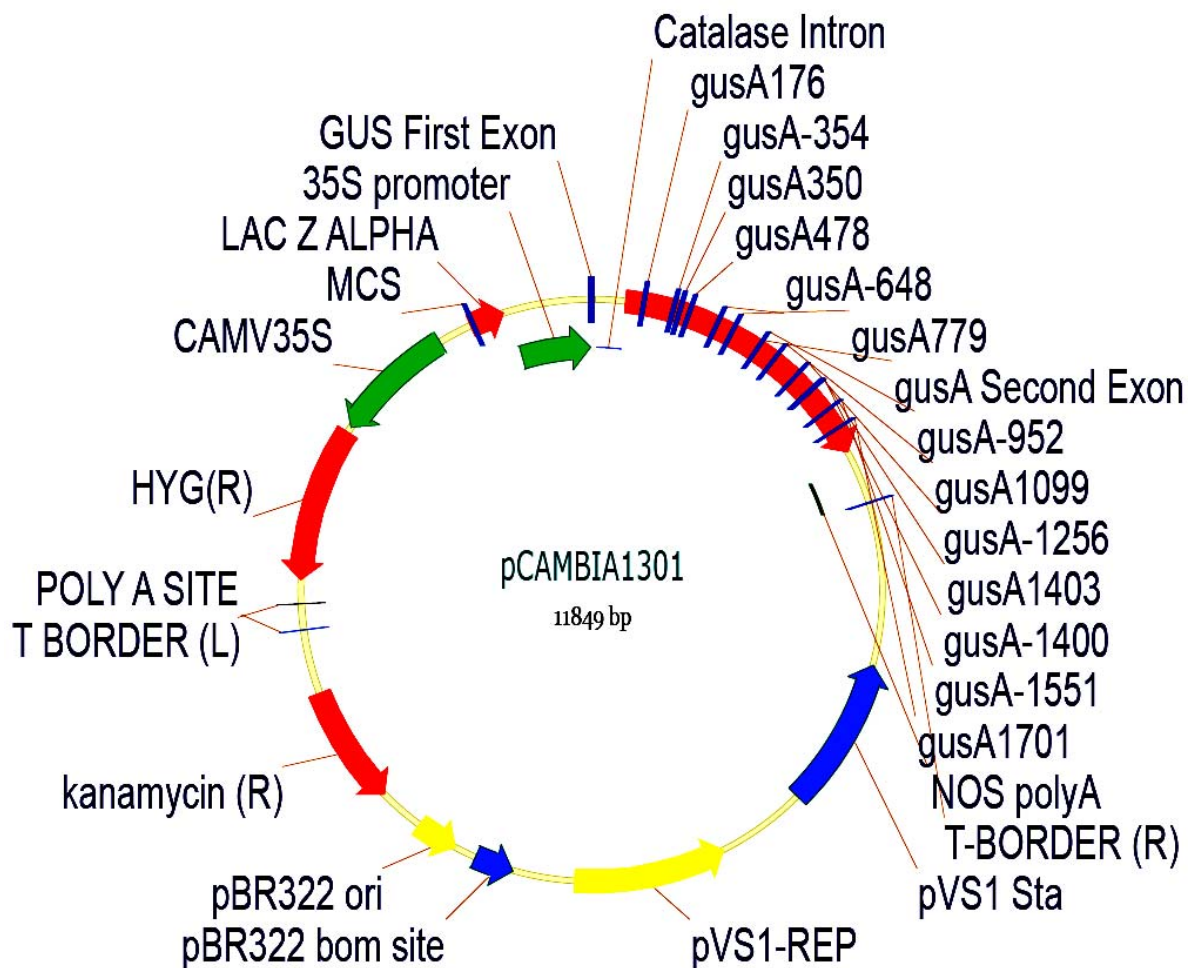

Scheme S1: Structure of pCambia1301

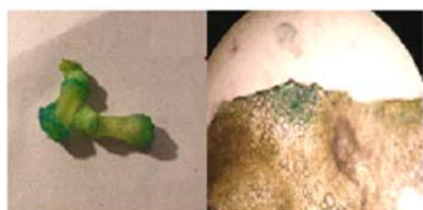

**Fig-a**

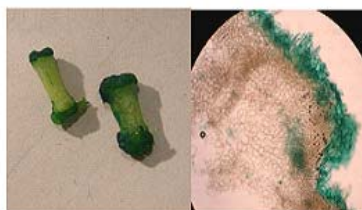

**Fig-b**

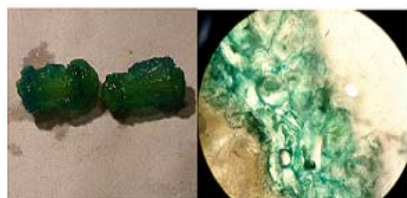

**Fig-c**

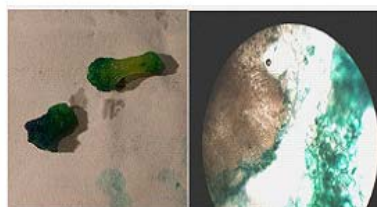

**Fig-d**

Fig S1: Histochemical GUS assay of hypocotyl explants of *Brassica juncea* L. cv. *Pusa Jaikisan* at different times of incubation: a) 40 min; b) 60min; c)80min; d) 120min.
